# Supplementary material for: Synthesis and Evaluation of 1,3,5-Triaryl-2-Pyrazoline Derivatives as Potent Dual Inhibitors of Urease and α-Glucosidase Together with Their Cytotoxic, Molecular Modeling and Drug-Likeness Studies
Source: PubMed Central journal article supplement — ACS Omega. 2022 Jan 20;7(4):3775–95. doi: 10.1021/acsomega.1c06694 (PMC8811919; doi:10.1021/acsomega.1c06694), 2022-01-20
Supplement: ao1c06694_si_001.pdf [file ao1c06694_si_001.pdf]

## Supplementary Information

### **Synthesis and Evaluation of 1,3,5-Triaryl-2-Pyrazoline Derivatives as Potent Dual Inhibitors of Urease and Alpha-Glucosidase Together with their Cytotoxic, Molecular Modeling and Drug-Likeness Studies**

Rabia Mehmood<sup>a</sup>, Amina Sadiq<sup>\*a</sup>, Reem I. Alsantali<sup>b</sup>, Ehsan Ullah Mughal<sup>\*c</sup>, Meshari A. Alsharif<sup>d</sup>, Nafeesa Naeem<sup>c</sup>, Asif Javid<sup>c</sup>, Munirah M. Al-Rooqi<sup>d</sup>, Gul-e-Saba Chaudhry<sup>e,f</sup>,  
Saleh A. Ahmed<sup>\*d,g</sup>

<sup>a</sup>*Department of Chemistry, Govt. College Women University, Sialkot-51300, Pakistan*

<sup>b</sup>*Department of Pharmaceutical Chemistry, College of Pharmacy, Taif University, P.O. Box 11099, Taif 21944, Saudi Arabia*

<sup>c</sup>*Department of Chemistry, University of Gujrat, Gujrat-50700, Pakistan*

<sup>d</sup>*Department of Chemistry, Faculty of Applied Sciences, Umm Al-Qura University, Makkah 21955, Saudi Arabia*

<sup>e</sup>*Institute of Marine Biotechnology, Universiti Malaysia Terengganu, 21030, Kuala Nerus, Terengganu, Malaysia*

<sup>f</sup>*Microbiology and Biotechnology Research Lab, Fatima Jinnah Women University, Rawalpindi-23451, Pakistan*

<sup>g</sup>*Department of Chemistry, Faculty of Science, Assiut University, 71516 Assiut, Egypt*

| <b>Contents</b>                                                                          | <b>Page No.</b> |
|------------------------------------------------------------------------------------------|-----------------|
| <b>Figure S1. FTIR Spectrum of Compound 2a</b>                                           | <b>S2</b>       |
| <b>Figure S2. FTIR Spectrum of Compound 2c</b>                                           | <b>S3</b>       |
| <b>Figure S3. FTIR Spectrum of Compound 2d</b>                                           | <b>S4</b>       |
| <b>Figure S4. FTIR Spectrum of Compound 2e</b>                                           | <b>S5</b>       |
| <b>Figure S5. FTIR Spectrum of Compound 2f</b>                                           | <b>S6</b>       |
| <b>Figure S6. <sup>1</sup>H NMR Spectrum (500 MHz, CDCl<sub>3</sub>) (Compound 2a)</b>   | <b>S7</b>       |
| <b>Figure S7. <sup>13</sup>C NMR Spectrum (126 MHz, CDCl<sub>3</sub>) (Compound 2a)</b>  | <b>S7</b>       |
| <b>Figure S8. <sup>1</sup>H NMR Spectrum (500 MHz, CDCl<sub>3</sub>) (Compound 2c)</b>   | <b>S8</b>       |
| <b>Figure S9. <sup>13</sup>C NMR Spectrum (126 MHz, CDCl<sub>3</sub>) (Compound 2c)</b>  | <b>S8</b>       |
| <b>Figure S10. <sup>1</sup>H NMR Spectrum (500 MHz, CDCl<sub>3</sub>) (Compound 2d)</b>  | <b>S9</b>       |
| <b>Figure S11. <sup>13</sup>C NMR Spectrum (126 MHz, CDCl<sub>3</sub>) (Compound 2d)</b> | <b>S9</b>       |
| <b>Figure S12. <sup>1</sup>H NMR Spectrum (500 MHz, CDCl<sub>3</sub>) (Compound 2g)</b>  | <b>S10</b>      |
| <b>Figure S13. <sup>13</sup>C NMR Spectrum (126 MHz, CDCl<sub>3</sub>) (Compound 2g)</b> | <b>S10</b>      |

\*Correspondence may be addressed to: Amina Sadiq, Ehsan Ullah Mughal and Saleh A. Ahmed; E-mail address: [amina.sadiq@gcwus.edu.pk](mailto:amina.sadiq@gcwus.edu.pk), [ehsan.ullah@uog.edu.pk](mailto:ehsan.ullah@uog.edu.pk), [saahmed@uqu.edu.sa](mailto:saahmed@uqu.edu.sa)

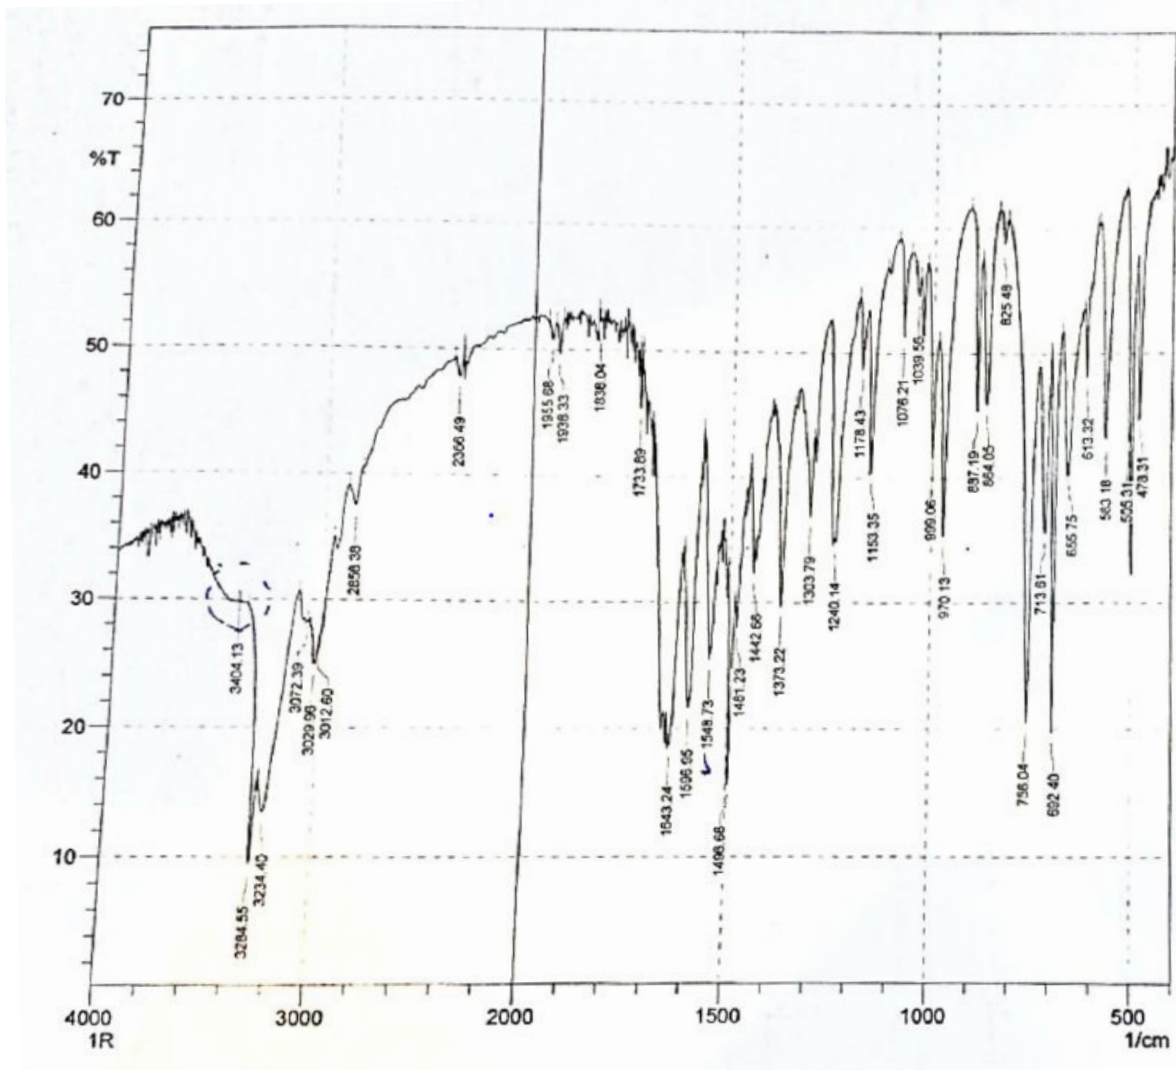

Figure S1. FTIR Spectrum of Compound 2a

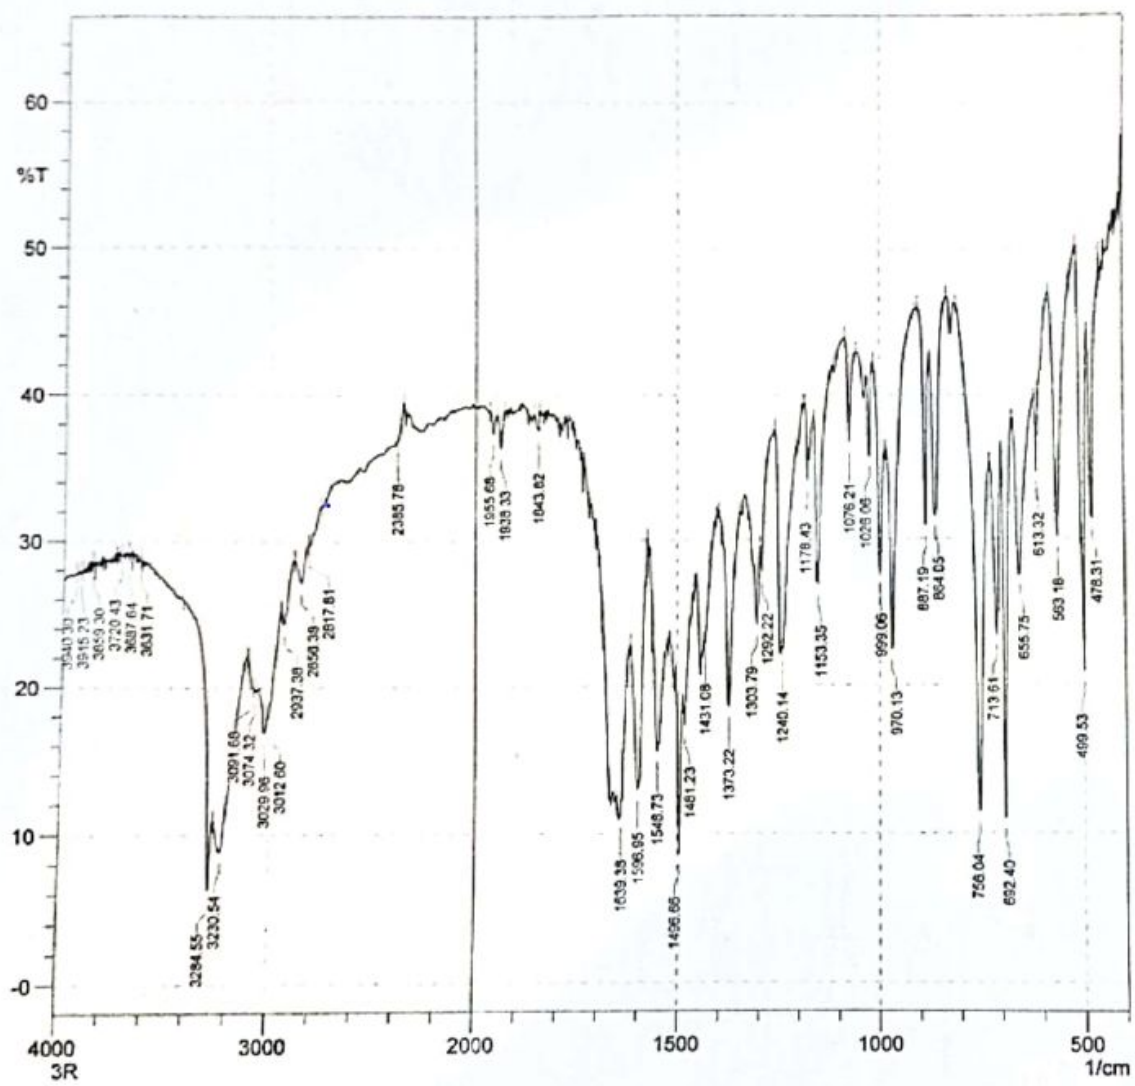

Figure S2. FTIR Spectrum of Compound 2c

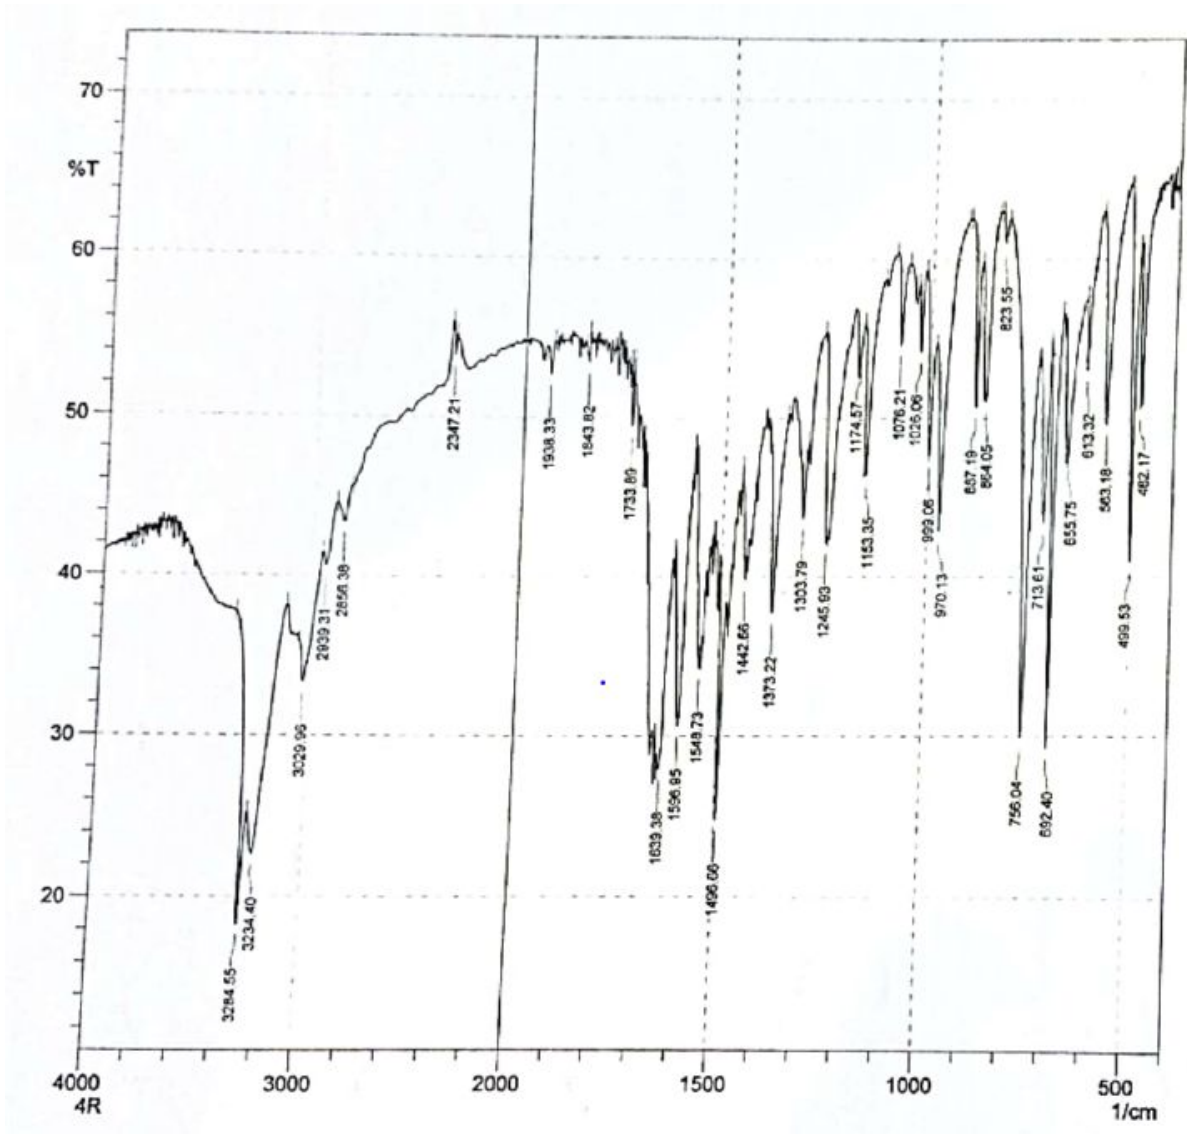

Figure S3. FTIR Spectrum of Compound 2d

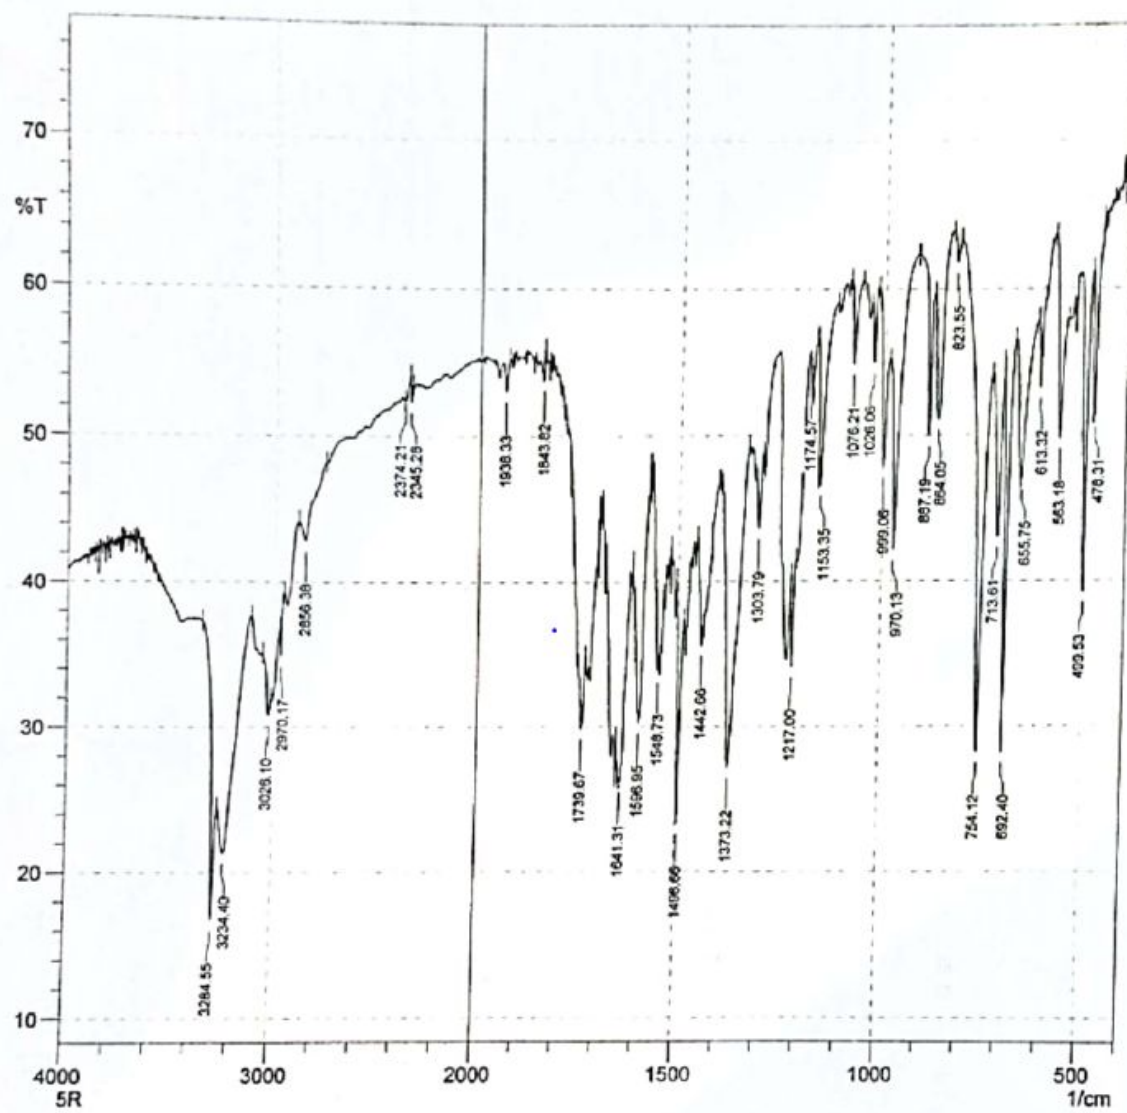

Figure S4. FTIR Spectrum of Compound 2e

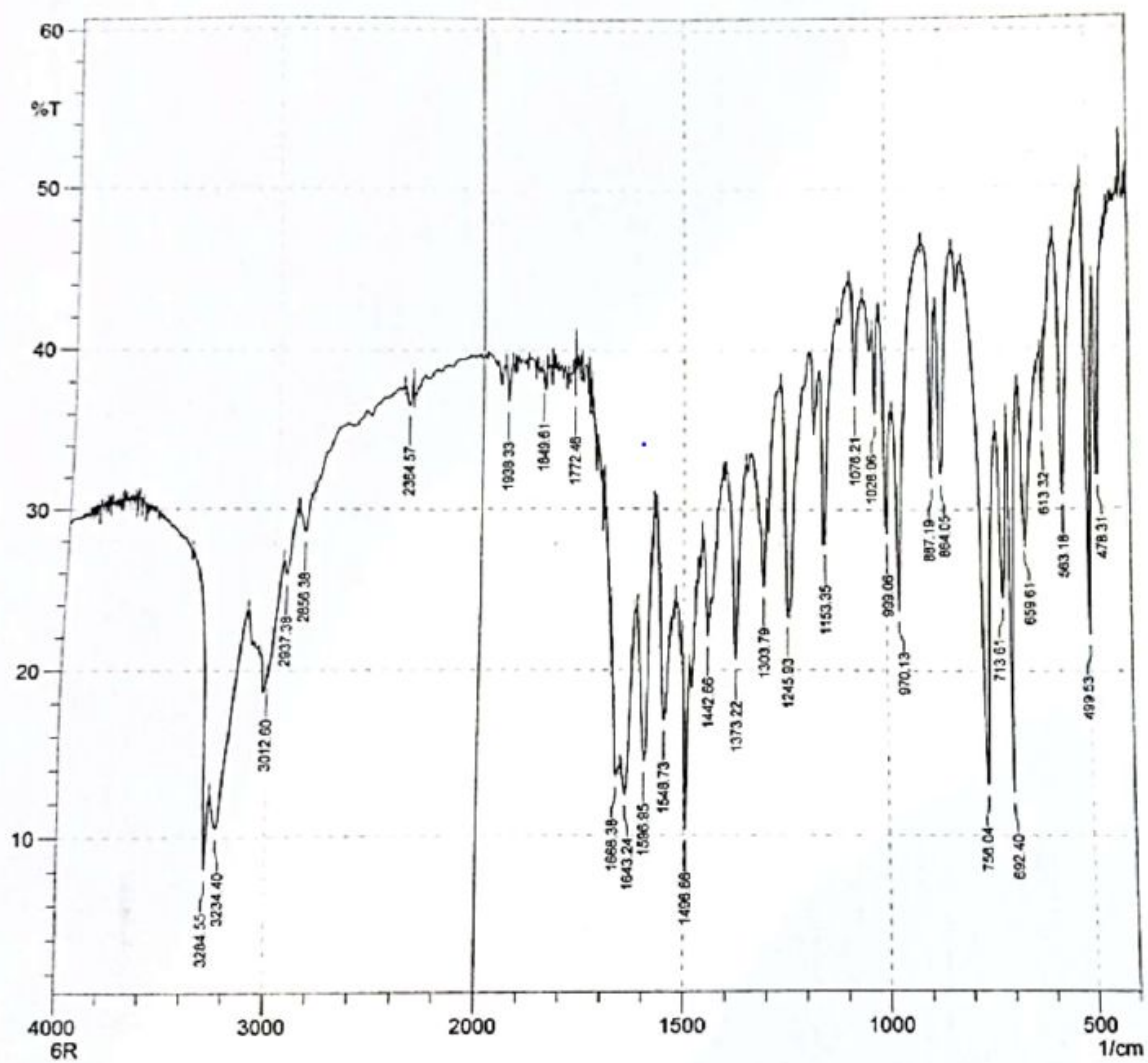

Figure S5. FTIR Spectrum of Compound 2f

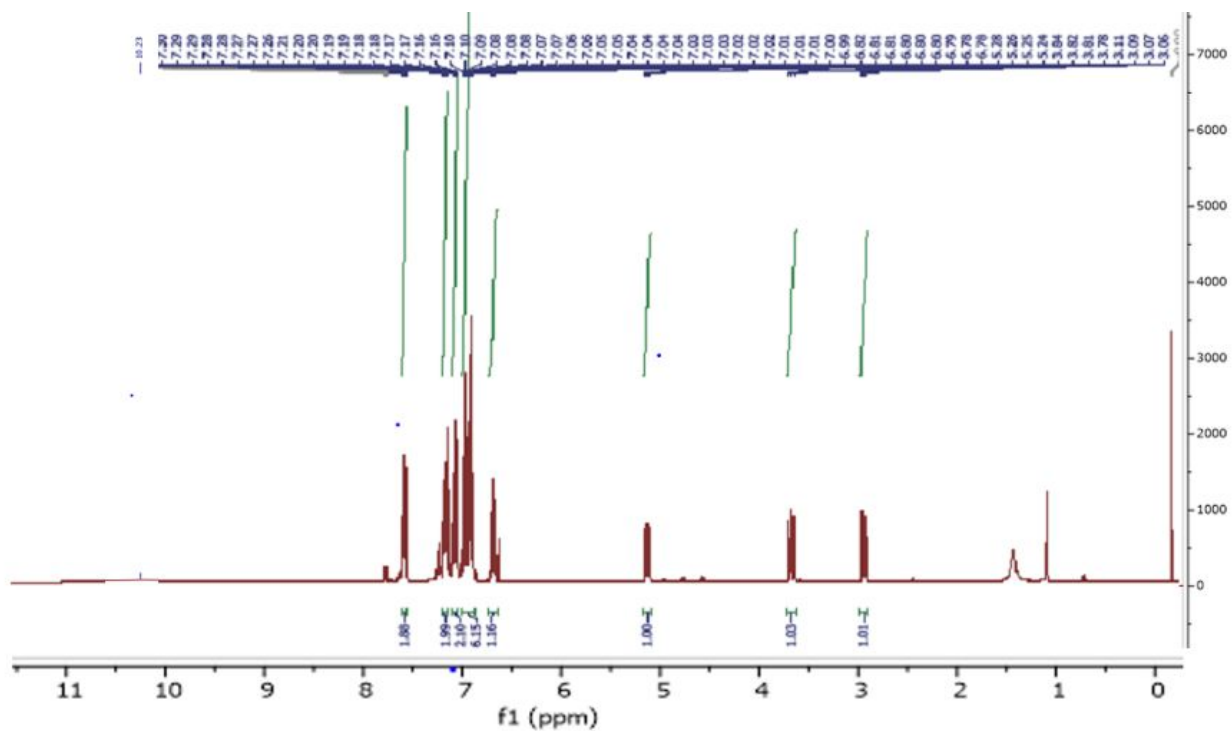

Figure S6.  $^1\text{H}$  NMR Spectrum (500 MHz,  $\text{CDCl}_3$ ) (Compound 2a)

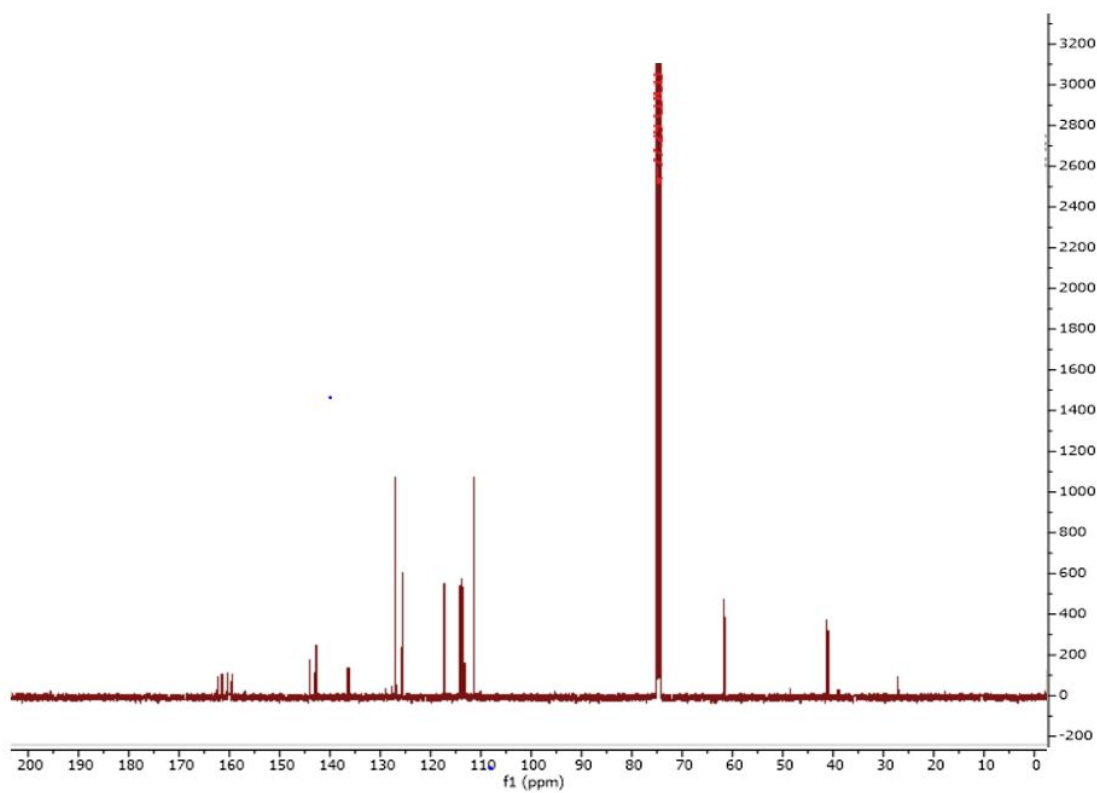

Figure S7.  $^{13}\text{C}$  NMR Spectrum (126 MHz,  $\text{CDCl}_3$ ) (Compound 2a)

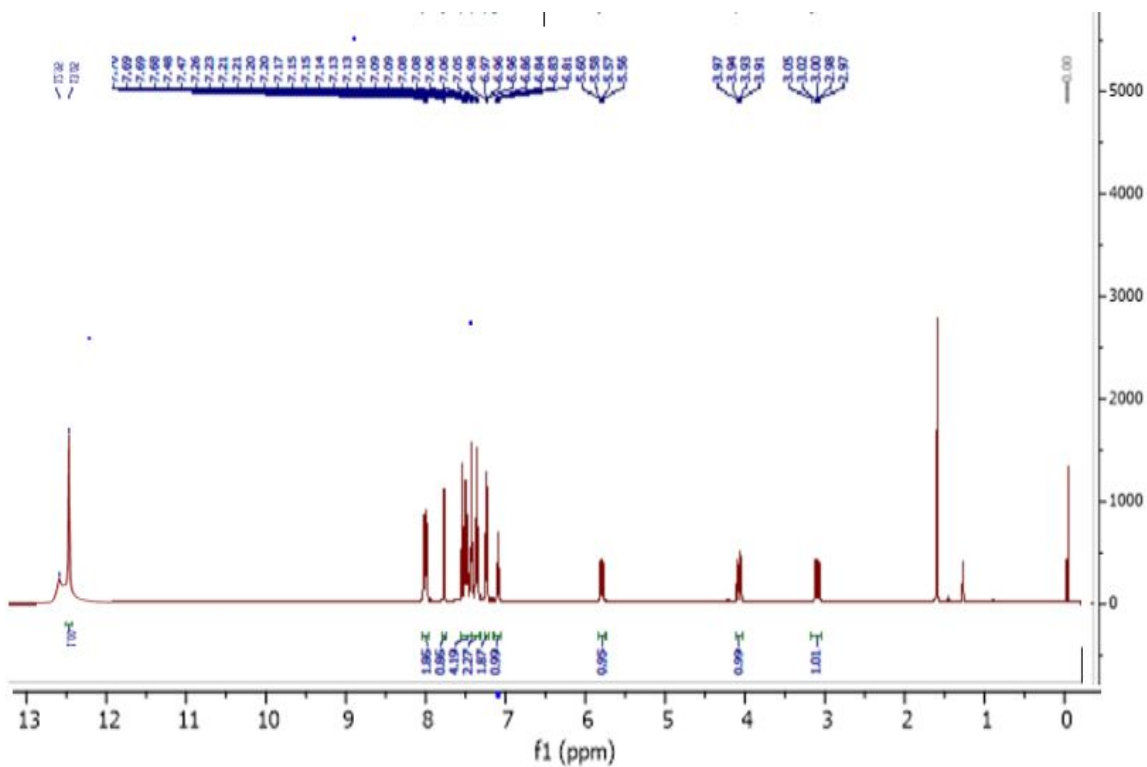

Figure S8.  $^1\text{H}$  NMR Spectrum (500 MHz,  $\text{CDCl}_3$ ) (Compound 2c)

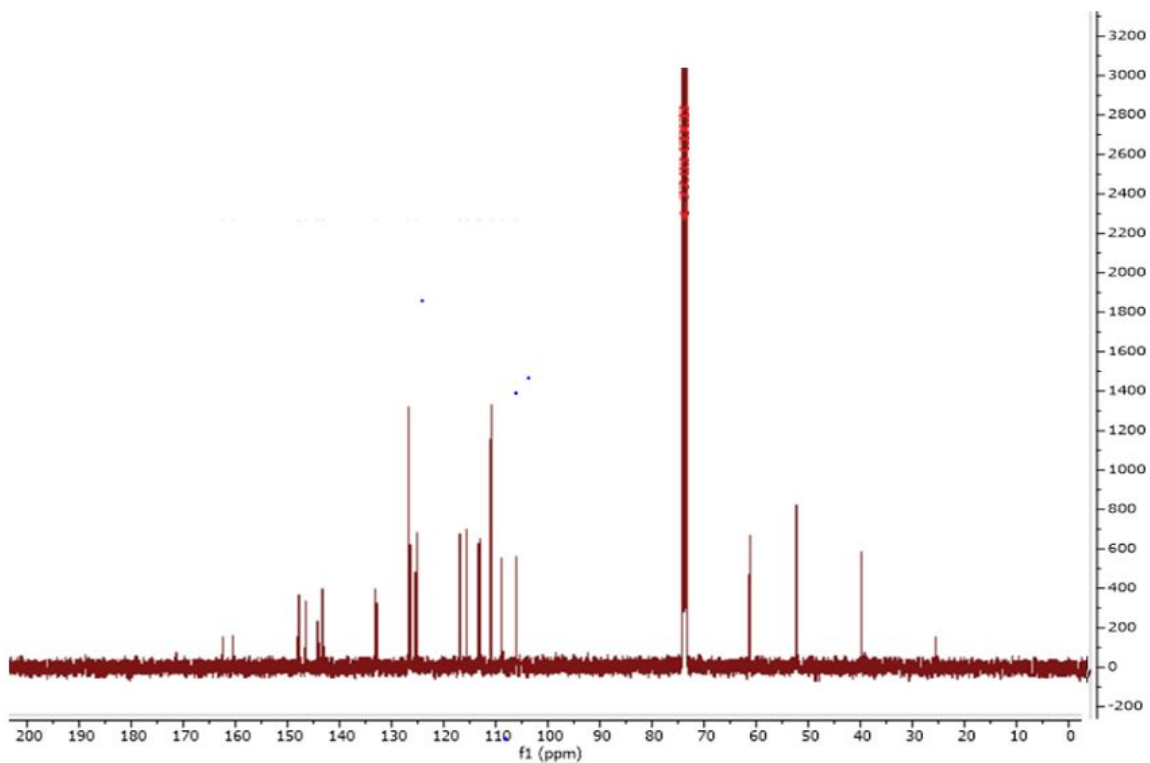

Figure S9.  $^{13}\text{C}$  NMR Spectrum (126 MHz,  $\text{CDCl}_3$ ) (Compound 2c)



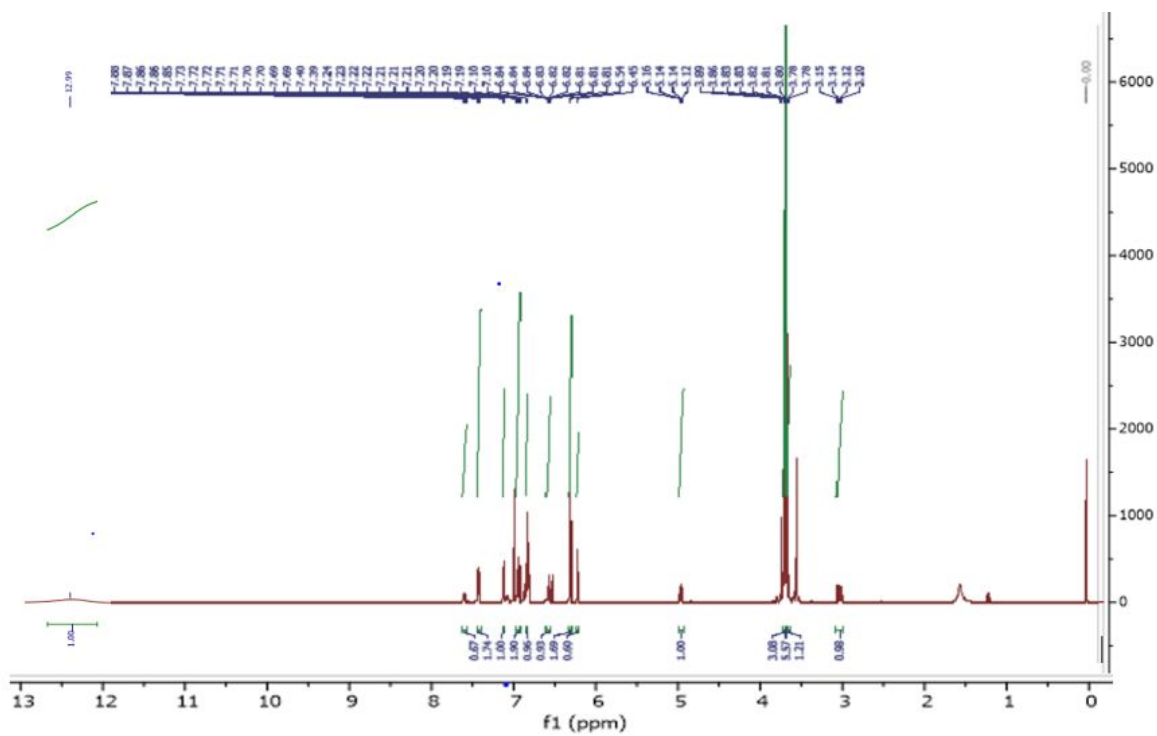

Figure S10.  $^1\text{H}$  NMR Spectrum (500 MHz,  $\text{CDCl}_3$ ) (Compound 2d)

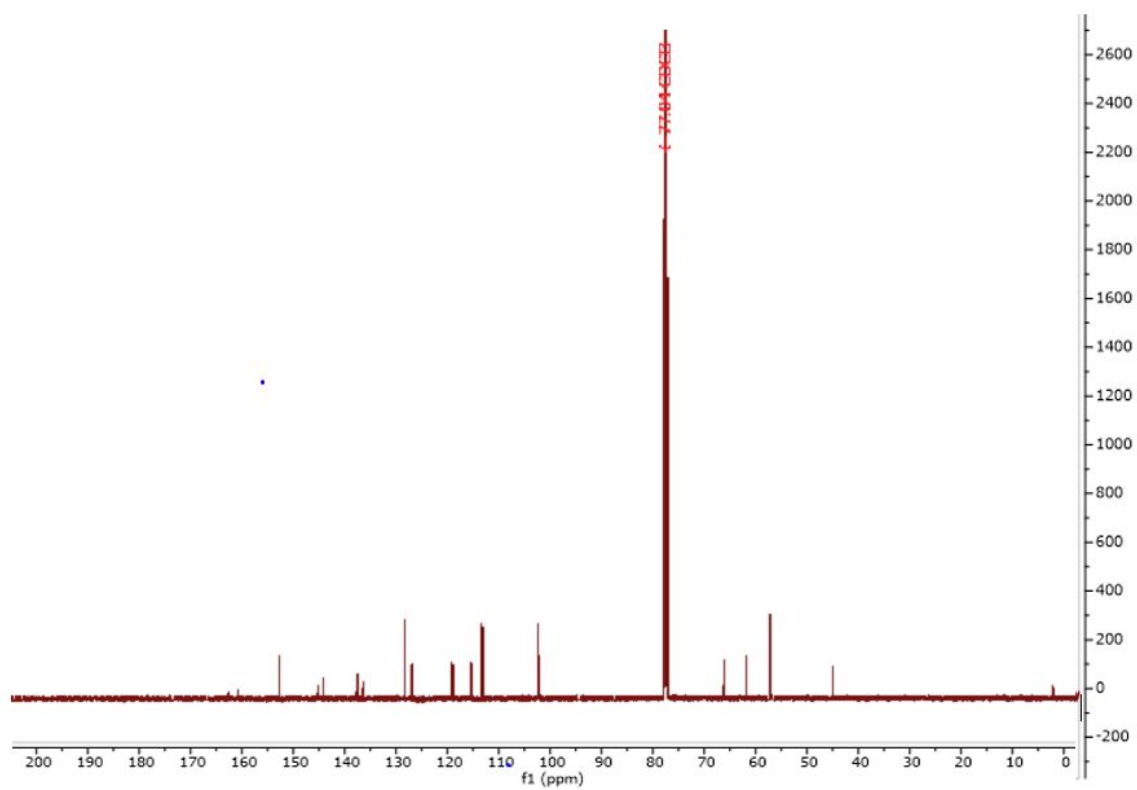

Figure S11.  $^{13}\text{C}$  NMR Spectrum (126 MHz,  $\text{CDCl}_3$ ) (Compound 2d)
